# Supplementary material for: Translesion polymerase kappa-dependent DNA synthesis underlies replication fork recovery
Source: eLife journal article supplement (doi:10.7554/elife.41426), 2018-11-13
Supplement: supp [file elife-41426-supp-v1.zip]

Archive with 12 entries (12 files):
- elife_poa_e41426_Figure_4_figure_supplement_1.ai
- elife_poa_e41426_Figure_1_figure_supplement_1.ai
- elife_poa_e41426_Figure_3_figure_supplement_2.ai
- elife_poa_e41426_Figure_1_figure_supplement_2.ai
- elife_poa_e41426_Figure_6_source_data_1.xlsx
- elife_poa_e41426_Figure_6_figure_supplement_1.ai
- elife_poa_e41426_Figure_5_figure_supplement_3.ai
- elife_poa_e41426_Transparent_Reporting_File.pdf
- elife_poa_e41426_Figure_3_figure_supplement_1.ai
- elife_poa_e41426_Figure_5_figure_supplement_1.ai
- elife_poa_e41426_Figure_5_source_data_1.xlsx
- elife_poa_e41426_Figure_5_figure_supplement_2.ai
