# Supplementary material for: Translesion polymerase kappa-dependent DNA synthesis underlies replication fork recovery
Source: eLife journal article supplement (doi:10.7554/elife.41426), 2018-11-13
Supplement: supp [file elife-41426-supp-v1.zip › elife_poa_e41426_Figure_5_source_data_1.xlsx]

## Sheet: Fig 5C
	Figure 5C	EdU Intensity per nucleus
	U2OS sgPolK Clone #1
	1hr 2mM HU pre treatment
	Add 10uM EdU to HU, 4hrs
	Threshold 34 EdU Channel, Size select greater 25
		Vector A				Vector B				Vector C					PolK WT A				PolK WT B				PolK WT C					PolK CD A				PolK CD B				PolK CD C					PolK UBZ A				PolK UBZ B				PolK UBZ C
	1	1	20.07		1	1	15.83		1	1	12.41			1	1	17.1		1	1	18.18		1	1	17.41			1	1	19.15		1	1	18.92		1	1	17.42			1	1	18.85		2	1	18.36		1	1
		2	25.38			2	22.39			2	15.67				2	15.26			2	12.54			2	12.5				2	21.11			2	24.32			2	19.54				2	13.83			2	19.44			2
		3	20.42			3	13.64			3	16.38				3	24.83			3	19.89			3	15.72				3	21.95			3	26.7			3	14.16				3	16.49			3	17.94			3
		4	13.09			4	14.83			4	15.62				4	15.69			4	19.52			4	20.2				4	17.78			4	14.29			4	16.9				4	16.64			4	11.28			4
		5	15.91			5	15.94			5	16.35				5	22.97			5	27.86			5	19.62				5	14.43			5	29.65			5	16.1				5	14.43			5	12.13			5
		6	12.27			6	14.03			6	16.6				6	14.62			6	20.29			6	24.01				6	15.29			6	14.91			6	15.64				6	14.75			6	16.38			6
		7	13.45			7	33.18			7	14.53				7	24.42			7	18.15			7	15.84				7	13.86			7	28.46			7	12.87				7	20.59			7	17.2			7
		8	18.06			8	21.53			8	20.47				8	19.11			8	21.38			8	20.43				8	22.63			8	22.87			8	13.44				8	16.45			8	13.69			8
		9	19.03			9	12.42			9	19.47				9	16.28			9	17			9	18.38				9	14.16			9	14.75			9	17.64				9	16.23			9	22.58			9
		10	19.34			10	13.65			10	15.14				10	17.22			10	18.04			10	15.8				10	24.18			10	17.24			10	17.86				10	14.9			10	12.25			10
		11	18.42			11	21.48			11	20.99				11	14.33			11	28.37			11	16.89				11	16.95			11	21.97			11	14.85				11	14.81			11	12.9			11
		12	13.5			12	21.46			12	14.99				12	12.82			12	24.08			12	13.93				12	21.23			12	15.48			12	16.62				12	15.02			12	14.1			12
		13	13.89			13	16.23			13	14.74				13	13.45			13	21.29			13	16.54				13	13.58			13	24.07			13	14.06				13	13.49			14	11.39			13
		14	20.19			14	14.68			14	15.43				14	19.01			14	20.87			14	14.64				14	17.07			14	14.99			14	13.38				14	17.04			15	16.39			14
		15	14.47			15	13.1			15	15				15	26.69			15	20.39			15	14.84				15	23.08			15	13.82			15	18.81				15	17.56			16	17.9			15
		16	14.42			16	28.67			16	14.17				16	18.54			16	24.04			16	19.12				16	22.44			16	25.96			16	36.46				16	15.22			17	25.65			16
		17	16.61			17	14.86			17	13.45				17	13.06			17	16.91			17	19.46				17	17.87			17	18.54			17	14.96				17	14.51			18	28.48			17
		18	19.3			18	13.17			18	13.06				18	21.84			18	20.22			18	13.19				18	15.32			18	16.89			18	17.13				18	15.31			19	15.07			18
		19	16.3			19	14.42			19	17.15				19	11.75			19	18.4			19	18.84				19	17.32			19	17.39			19	14.41				19	23			20	17.42			19
		20	13.5			20	15.59			20	14.44				20	14.15			20	25.84			20	13.45				20	15.14			20	17.19			20	32.91				20	23.08			21	15.98			20
		21	16.64			21	18.8			21	16.37				21	20.08			21	21.13			21	16.9				21	16.1			21	16.66			21	14.33				21	13.27			22	19.62			21
		22	15.69			22	22.7			22	24.11				22	12.68			22	13.77			22	13.61				22	17.33			22	18			22	14.29				22	25.6			23	24.09			22
		23	17			23	15.34			23	14.41				23	14.7			23	25.88			23	13.57				23	13.97			23	17.01			23	15.18				23	14.6			24	15.13			23
		24	18.03			24	12.41			24	27.1				24	15.86			24	18.38			24	12.69				24	13.86			24	18.3			24	15.96				24	21			25	21.49			24
		25	18.33			25	16.76			25	14.6				25	14.24			25	31.2			25	34.16				25	20.28			25	13.21			25	14.57				25	14.24			26	24.2			25
		26	16.5			26	14.51			26	14.06				26	13.65			26	37.81			26	15.99				26	18.77			26	17.36			26	25.27				26	15.46			27	27.09			26
		27	14.42			27	13.12			27	13.34				27	18.91			27	16.03			27	16.78				27	22.63			27	14.58			27	13.1				27	12.64			28	15.09			27
		28	17.95			28	14.48			28	16.78				28	17.88			28	25.35			28	23.59				28	18.78			28	19.1			28	16.19				28	18.99			29	12.86			28
		29	15.94			29	21.68			29	15.7				29	16.89			29	15.8			29	13.31				29	17.4			29	15.59			29	15.81				29	15.82			31	24.71			29
		30	17.21			30	18.42			30	15.67				30	16.15			30	27.84			30	13.14				30	18.31			30	13.79			30	14.02				30	13.85			32	24.08			30
		31	14.22			31	18.81			31	15.02				31	14.02			31	25.2			31	23.77				31	17.9			31	15.79			31	14.79				31	14.72			33	13.93			31
		32	18.86			32	18.62			32	16.91				32	19.37			32	20.88			32	13.28				32	13.69			32	21.47			32	15.66				32	19.51			34	12.37			32
		33	20.02			33	14.23			33	14.12				33	12.78			33	38.11			33	20.72				33	19.76			33	15.4			33	16.73				33	14.66			35	15.71			33
		34	15.27			34	15.55			34	11.98				34	17.45			34	22.33			34	25.51				34	18.87			34	14.29			34	18.3				34	21.2			36	14.92			34
		35	22.39			35	19.05			35	15.47				35	22.58			35	13.48			35	12.98				35	12.7			35	18.25			35	16.31				35	18.74			37	15.36			35
		36	15.14			36	16.64			36	16.18				36	18.97			36	21.88			36	27.66				36	17.68			36	22.78			36	18.23				36	17.09			38	21.71			36
		37	15.75			37	20.01			37	14.53				37	24.11			37	13.23			37	13.29				37	16.88			37	16.48			37	14.81				37	14.02			39	16.56			37
		38	22.64			38	13.37			38	15.41				38	12.77			38	24.42			38	14.77				38	13.12			38	18.76			38	17.53				38	12.92			40	16.83			38
		39	22.02			39	13.5			39	14.15				39	13.58			39	23.12			39	17.99				39	14.27			39	26.55			39	18.78				39	14.87			41	13.49			39
		40	11.57			40	22.27			40	12.76				40	12.45			40	29.14			40	17.93				40	18.72			40	17.02			40	13.27				40	16.55			42	15.1			40
		41	21.93			41	18.09			41	14.44				41	15.02			41	25.68			41	27.95				41	19.61			41	15.11			41	13.62				41	13.28			43	16.05			41
		42	18.63			42	16.83			42	13.08				42	23.29			42	13.9		2	2	16.53				42	14.74			42	13.5			42	15.68				42	12.1			44	26.49			42
		43	16.14			43	13.97			43	19.27				43	16.83			43	13.75			3	14.74				43	16.26			43	17.9			43	21.47				43	25.61			45	14.36			43
		44	13.7			44	14.84			44	15.49				44	13.75			44	16.42			4	22.03				44	14.63			44	15.52			44	15.14				44	19.48			46	16.41			44
		45	15.42			45	15.52			45	17.11				45	26.15			45	19.06			5	40.77				45	19.82			45	17.47			45	24.42				45	14.89			47	12.87			45
		46	13.47			46	15.47			46	15.03				46	13.58			46	26.52			6	32.24			2	1	22.34			46	25.17			46	16.77				46	13.12			48	21.7			46
		47	13.35			47	15.07			47	15.45				47	14.43			47	16.16			7	18.78				2	27.2			47	17.91			47	15.87				47	13.75			49	14.13			47
		48	13.74			48	17.88			48	31.32				48	20.98			48	20.39			8	17.41				3	12			48	12.73			48	16.42				48	17.22			50	28.8			48
		49	14.42			49	16.9			49	18.1				49	17.38			49	23.86			9	21.19				4	13.3			49	16.86			49	13.8				49	18.01			51	15.47			49
		50	14.68			50	20.58			50	17.48				50	17.61			50	21.55			10	29.05				5	20			50	12.52			50	16.32				50	14.18			53	18.73			50
	2	1	21.65			51	16.13			51	16.62				51	15.48			51	21.68			11	20.31				6	19.91			51	16.99			51	16.89				51	14.2			54	11.71			51
		2	15.64			52	20.05			52	13.13				52	13.94			52	15.96			12	13.47				7	20.79			52	12.51			52	12.68				52	13.99			55	15.28			52
		3	19.59			53	14.9			53	14.85				53	24.57			53	30.4			13	18.53				8	15.05			53	14.14		2	1	19.9				53	13.67			56	14.89			53
		4	20.34			54	26.74			54	18.94				54	34.27			54	20.31			14	40.27				9	17.76			54	18.61			2	15.35				54	13.31			57	14.46			54
		5	13.14			55	15.41			55	17.03				55	17.69			55	14.08			15	13.53				10	15.27			55	13.29			3	16.54				55	17.67			58	18.72			55
		6	18.01			56	14.87			56	13.87				56	17.97			56	17.19			16	13.72				11	16.27			56	17.39			4	12.19				56	15.48			59	12.82			56
		7	14.51			57	15.21			57	16.84				57	13.4			57	21.86			17	17.52				12	16.32			57	12.46			5	13.92				57	13.37			60	16.14			57
		8	14.83			58	16.86			58	13.85				58	16.41			58	26.03			18	18.79				13	21.25			58	15.09			6	14.76			2	1	19.49			61	20.4			58
		9	18.85			59	16.36			59	12.94				59	18.12			59	26.98			19	13.56				14	20.43			59	16.91			7	15.45				2	19.64			62	17.93			59
		10	14.19			60	13.72			60	12.43				60	18.82			60	24.34			20	13.48				15	17.32			60	27.66			8	15.94				3	17.07			63	20.58			60
		11	14.13			61	18.55			61	15.98			2	1	27.77			61	21.92			21	14.38				16	20.47			61	18.11			9	14.9				4	21.06			64	23.15			61
		12	13.41			62	17.91			62	13.57				2	30.02		2	1	18.53			22	14.47				17	19.24			62	17.98			12	14.47				5	17.45			65	15.24			62
		13	14.31			63	16.28			63	16.21				3	22.27			2	12.39			23	29.13				18	28.31			63	16.9			13	13.58				6	13.59			66	15.77			63
		14	15.04			64	16.94			64	13.42				4	26.22			3	15.37			24	16.2				19	32.49			64	18.01			14	15.78				7	14.39			67	23.89			64
		15	14.46			65	14.39			65	13.95				5	19.47			4	12.69			25	14.77				20	23.26			65	23.98			15	16.32				8	13.99		3	1	14.06			65
		16	14.74			66	16.1			66	17.3				6	17.68			5	16.56			26	24.88				21	15.47			66	15.03			16	16.15				9	14.46			2	14.82			66
		17	15.07			67	15.73			67	21.19				7	17.3			6	21.22			27	30.32				22	23.5		2	1	13.95			17	14.7				10	15.34			3	16.32			67
		18	13.56			68	18.22			68	14.61				8	19.79			7	26.37			28	25.24				23	26.13			2	12.02			18	14.61				11	18.01			4	15.08			68
		19	14.66			69	22.47			69	13.91				9	13.28			8	26.21			29	22.03				24	17.66			3	12.68			19	16.05				12	13.06			5	15.17			69
		20	13.24			70	12.79			70	31.06				10	17.9			9	26.8			30	16.13				25	18.68			4	14.07			20	16.1				13	17.51			6	12			70
		21	14.4			71	13.57			71	15.4				11	18.87			10	14.48			31	31.29				26	25.67			5	11.91			21	15.13				14	30.75			7	13.82			71
		22	13.97			72	14.99			72	13.85				12	21.12			11	24.82			32	25.43				27	14.01			6	16.38			22	25.39				15	13.76			8	13.15			72
		23	15.39			73	15.79			73	17.35				13	16.86			12	21.46			33	13.16				28	14.59			7	13.62			23	13.1				16	12.62			9	20.42			73
		24	12.48			74	23.1			74	24.14				14	20.7			13	13.92			34	26.38				29	11.77			8	18.08			24	13.18				17	13.91			10	15.01			74
		25	15.76			75	18.41			75	15.02				15	11.92			14	17.31			35	23.78				30	13.93			9	17.57			25	13.52				18	18.86			11	15.93			75
		26	14.29			76	22.02			76	23.2				16	22.2			15	22.02			36	19.34				31	12.68			10	15.11			26	15.08				19	16.54			12	12.93			76
		27	18.7			77	25.14			77	15.97				17	12.85			16	17.45			37	12.83				32	15.62			11	13.56			27	15.69				20	13.58			13	16.56			77
		28	16.51			78	15.05			78	28.16				18	12.59			17	16.47			38	22.82				33	14.12			12	18.21			28	12.58				21	16.03			14	14.5			78
		29	24.8		2	1	20.57			79	12.96				19	16.91			18	16.44			39	15.21				34	13			13	18.87			29	36.48				22	31.95			15	12.66			79
		30	17.26			2	13.97			80	13.43				20	15.06			19	29.11			40	18.21				35	19.56			14	16.57			30	12.45				23	16.51			16	14.24			80
		31	16.87			3	18.49			81	16.93			3	1	18.34			20	12.78			41	19.3				36	17.18			15	19.7			31	12.91				24	15.57			17	13			81
		32	21.67			4	19.25			82	15.11				2	13.87			21	25.29			42	29.34				37	19.32			16	15.39			32	13.7				25	13.19			18	22.71			82
		33	14.58			5	24.54			83	21.62				3	15.95			22	33.28			43	24.2				38	15.37			17	17.13			33	16.36				26	12.14			19	14.64		3	1
		34	14.57			6	13.32			84	13.78				4	26.18			23	20.93			44	22.2				39	18.77			18	30.59			34	17.51				27	12.91			20	12.03			2
		35	12.85			7	21.24			85	18.5				5	13.75			24	14.34			45	23.42				40	14.29			19	30.32			35	16.83				28	14.87			21	15.29			3
		36	14.3			8	19			86	23.61				6	14.39		3	1	32.8			46	31.22				41	19.41			20	24.52			36	15.5				29	16.7			22	17.62			4
		37	13.51			9	15.68			87	20.16				7	13.24			2	25.75			47	19.55				42	29.43			21	20.97			37	13.4				30	13.6			23	27.17			5
		38	14.06			10	14.41			88	16.81				8	25.61			3	21.4			48	34.1				43	18.78			22	17.19			38	14.14				31	13.86			24	13.87			6
		39	12.04			11	14.01			89	13.09				9	26.1			4	16			49	18.71				44	12.56			23	20.25			39	14.43				32	13.35			25	11.97			7
		40	19.61			12	16.94			90	14.24				10	21.92			5	22.46			50	13.04				45	21.1			24	22.14			40	18.82				33	12.65			26	25.7			8
		41	24.56			13	15.06			91	16.04				11	30.57			6	18.35		3	1	25.69			4	1	23.79			25	18.63			41	20.54				34	15.12			27	22.03			9
		42	17.75			14	17.67			92	13.58				12	15.41			7	33.65			2	17.86				2	13.06			26	13.94			42	16.12				35	19.18			28	16.91			10
		43	16.47			15	20.7			93	14.54				13	21.83			8	25.61			3	20.18				3	15.36			27	15.2			43	24.6				36	12.41			29	16.21			11
		44	15.7			16	18			94	17.66				14	14.97			9	15.11			4	21.4				4	24.37			28	21.83			44	14.58				37	13.92			30	15.27			12
		45	19.77			17	29.89			95	19.16				15	27.83			10	26.89			5	24.47				5	13.42			29	17.05			45	22.18				38	15.78			31	12.44			13
		46	16.52			18	15.65			96	14.11				16	25.58			11	23.14			6	26.8				6	19.22			30	18.26			46	17.88				39	18.58			32	16.37			14
		47	18.47			19	15.87			97	17.55				17	18.45			12	17.73			7	20.97				7	17.51			31	16.12			47	13.04				40	20.91			33	17.42			15
		48	18.9			20	21.06			98	16.78				18	15.08			13	25.04			8	22.44				8	17.67			32	14.79			48	15.33				41	15.35			34	21.36			16
	2	1	12.92			21	21.74			99	22.78				19	24.58			14	23.83			9	18.82				9	15.5			33	19.04			49	19.61				42	19.36			35	12.88			17
		2	13.14			22	30.68			100	15.03				20	17.27			15	23.39			10	16.11				10	16.48			34	21.12			50	17.51				43	24.31			36	15.22			18
		3	14.41			23	19.85			101	17.79				21	16.03			16	18.5			11	24.55				12	16.46			35	15.17			51	26.22				44	17.71			37	25.73			19
		4	14.13			24	16.4			102	19.66				22	13.36			17	28.31			12	20.19				13	21.5			36	21.52			52	17.71				45	18.31			38	16.37			20
		5	19.26			25	22.7			103	17.18				23	17.19			18	19.12			13	24.06				14	19.35			37	19.96			53	15.68				46	15.23			39	15.06			21
		6	16			26	18.68			104	16.32				24	21.64			19	25.01			14	15.19				15	13.18			38	19.56			54	13.54				47	32.96			40	19.82			22
		7	18.54			27	12.9			105	34.4				25	12.38			20	24.53			15	23.13				16	24.14			39	15.42			55	20.31				48	15.52			41	14.07			23
		8	15.58			28	20.45			106	15.97				26	15.91			21	31.26			16	18.33				17	15.59			40	18.12			56	17.88				49	24.09			42	21.98			24
		9	16.14			29	17.61			107	18.64				27	28.28			22	23.23			17	18.31				18	13.39			41	18.66			57	14.02				50	15.22			43	14.45			25
		10	20.26			30	16.9			108	12.83				28	20.26			23	15.87			18	18.24				19	12.46			42	16.71			58	12.92				51	22.87			44	14.41			26
		11	15.82			31	15.43		2	1	17.27				29	27.05			24	21.23			19	15.72				20	15.46			43	18.34			59	13.24				52	20.37			45	29.34			27
		12	15.93			32	17.98			2	12.89				30	21.54			25	19.42			20	23.81				21	16.55			44	20.53			60	21.42				53	23.16			46	13.85			28
		13	18.16			33	17.13			3	15.55				31	19.66			26	14.94			21	22.51				22	17.54			45	14.08			61	14.88				54	16.02			47	12.21			29
		14	13.65			34	20.11			4	18.63				32	27.49			27	16.18			22	30.48				23	13.69			46	21.14			62	19.03				55	18.81			48	15.72			30
		15	13.92			35	20.23			5	18.17				33	20.35			28	17.33			23	21.76				24	15.45			47	19.18			63	22.28				56	13.63			49	14.93			31
		16	15.03			36	20.26			6	13.76				34	20.32			29	17.19			24	22.67				25	17.04			48	17.38			64	15.24				57	13.83			50	13.94			32
		17	18.07			37	17.09			7	13.97				35	17.32			30	15.39			25	25.22				26	13.46			49	30.88			65	13.67				58	15.76			51	14.52			33
		18	12.55			38	19.79			8	12.66				36	18.58			31	13.72			26	18.25				27	13.07			50	18.35			66	19.46				59	14.74			52	13.86			34
		19	12.14			39	14.63			9	29.3				37	13.96			32	18.6			27	23.56				28	13.87			51	14.84			67	20.34				60	12.64			53	12.9			35
		20	14.17			40	16.26			10	18.69				38	19.88			33	17.49			28	15.74				29	17.41			52	14.93			68	13.81				61	14.27			54	13.49			36
		21	15.06			41	14.07			11	14.54				39	12.97			34	13.72			29	18.94				30	22.52			53	20.79			69	23.17				62	14.03			55	16			37
		22	13.77			42	16.83			12	19.68				40	23.57			35	17.65			30	24.26				31	19.84			54	21.51			70	17.67				63	24.29			56	17.34			38
		23	12.86			43	17.6			13	18.71				41	21.57			36	21.03			31	27.02				32	19.24			55	14.96			71	24.95				64	13.8			57	14.03			39
		24	13.35			44	12.76			14	15.35				42	29.47			37	23.77			32	22.38				33	19.75			56	15.95			72	17.18				65	19.2			58	17.45			40
		25	15.11			45	13.56			15	13.45				43	43.92			38	20.2			33	21.13				34	12.2			57	12.95			73	13.3				66	12.92			59	13.54			41
		26	12.88							16	14.46				44	19.21			39	32.81			34	17.67				35	14.66			58	13.09			74	14.27				67	23.49			60	17.72			42
		27	14.8							17	15.34				45	25.36			40	19.62			35	13.55				36	15.02			59	14.13			75	15.72				68	18.62			61	14.88			43
		28	15.89							18	13.4				46	11.75			41	21.94			36	25.03				37	15.6			60	14.86			76	19.76				69	15.84			62	18.54			44
		29	20.25							19	21.74				47	12.71			42	15.72			37	27.15				39	19.77			61	18.32			77	13.74				70	17.95			63	20.72			45
		30	12.53							20	17.8				48	12.35			43	26.76			38	26.98				40	15.12			62	29.23		4	1	14.1				71	14.14			64	14.45			46
		31	25.96							21	19.2				49	37.92			44	19.12			39	12.75				41	22.73			63	16.63			2	12.87				72	16.92			65	24.68			47
		32	23.66							22	22.42				50	19.41			45	32.75			40	17.13				42	19.1			64	18.06			3	15.79				73	18.36			66	16.44			48
		33	13.42							23	22.54				51	20			46	26.05			41	17.26				43	15.98			65	16.27			4	23.99				74	32.39			67	17.12			49
		34	15.7							24	15.38				52	20.88			47	16			42	26.56				44	25.97			66	14.06			5	16.98				75	13.32			68	18.79			50
		35	12.64							25	18.36				53	12.93			48	16.71			43	21.9			5	1	14.78			67	15.79			6	14.84				76	13.91			69	23.05			51
		36	12.59							26	22.32				54	15.62			49	15.38			44	23.81				2	19.46			68	17.26			7	19.26				77	21.06			70	12.91			52
		37	22.36							27	15.06				55	27.52			50	22.03			45	15.94				3	12.89			69	14.45			8	14.18				78	14.7			71	17.47			53
		38	14.74							28	16.45				56	20.86			51	14.94			46	17.97				4	19.59			70	12.68			9	18.03				79	19.74			72	26.99			54
		39	20.49							29	14.61				57	16.45			52	14.79			47	19.8				5	16.8			71	16.1			10	15.49				80	16			73	20.91			55
		40	16.22							30	17.06				58	18.73			53	16.98			48	22.37				6	18.84			72	17.2			11	15.58				81	17.47			74	13.07			56
		41	19.96							31	14.23				59	25.76			54	31.6			49	27.73				7	16.09		3	1	14.35			12	19.57				82	14.11			75	15.9			57
		42	12.31							32	13.94				60	16.13			56	24.82			50	21.95				8	16.34			2	16.44			13	16.95				83	23.34			76	13.12			58
		43	14.42							33	24.74				61	14.04			58	14.6			51	21.82				9	14.21			3	12.59			14	16.93				84	13.8			77	15.75			59
		44	14.74							34	15.49				62	21.03			59	24.63			52	17.07				10	12.01			4	12.71			15	13.37				85	17			78	18.87			60
		45	18.45							35	21.06				63	14.8			60	33.66			53	24.18				11	14.01			5	17.57			16	14.53				86	17.95			79	15.89			61
		46	14.8							36	21.61								61	28.12			54	16.34				12	15.49			6	16.37			17	13.83				87	16.06			80	16.18			62
		47	14.46							37	14.05								62	18.23			55	19.07				13	15.46			7	17.9			18	14.32				88	13.55			81	13.07			63
		48	12.86							38	14.91								63	24.88			56	18.99				14	17			8	15.41			19	23.71				89	13.66			82	15.76			64
		49	21.36							39	31.45								64	16.81			57	15.74				15	12.65			9	13.14			20	13.14				90	20.11			83	19.22			65
		50	15.47							40	14.84								65	21.37			58	35.89				16	13.34			10	17.09			21	23.5				91	11.97			84	13.84			66
		51	15.62							41	18.35								66	29.2			59	25.12				17	11.54			11	15.3			22	12.89				92	13.14			85	12.97			67
		52	15.93							42	14.63								67	27.58			60	21.58				18	23.08			12	16.32			23	13.49				93	13.88			86	14.38			68
		53	18.89							43	17.68								68	24.59			61	21.81				19	16.83			13	20.15			24	13.05				94	26.35			87	17.8			69
		54	12.1							44	17.27								69	24.53			62	22.73				20	13.01			14	17.49			25	14.37				95	20.48			88	14.04			70
		55	12.84							45	14.12								70	23.23			63	13.51				21	13.04			15	12.8			26	24.66				96	12.63			89	13.98			71
		56	20.23							46	15.36								71	24.79			64	19.26				22	16.91			16	15.65			27	15.92			3	1	18.46			90	15.73			72
		57	19.48							47	16.02								72	26.71			65	17.9				23	18.96			17	18.34			28	18.17				2	14.06			91	14.36			73
		58	12.56							48	21.86								73	32.06			66	16.33				24	15.79			18	14.29			29	13.82				3	13.9			92	15.37			74
		59	14.07							49	16.77								74	29.91			67	26.34				25	15.02			19	13.23			30	13.84				4	12.2			93	18.32			75
		60	18.52							50	15.24								75	15.95			68	15.28				26	13.7			20	17.08			31	18.72				5	13.79			94	20.7			76
		61	14.94							51	14.92								76	20.7			69	12.6				27	14.91			21	17.3			32	21.15				6	11.89			95	15.04			77
		62	21.9							52	16.57								77	34.19			70	23.67				28	13.47			22	12.92			33	19.71				7	13.14			96	13.28		4	1
		63	22.45							53	23.44								78	19.7			71	20.16				29	13.91			23	37.84			34	20.24				8	13.78			97	15.1			2
		64	12.61							54	21.77								79	18.3			72	12.55				30	14.6			24	12.34			35	16.94				9	13.86			98	17.83			3
		65	14.18							55	17.86								80	16.04			73	22.52				31	14.13			25	14.58			36	19.21				10	13.48			99	17.95			4
		66	12.99							56	25.34								81	22.09			74	25.16				32	14.8			26	16.94			37	12.79				11	20.05			100	11.97			5
		67	22.04							57	14.99								82	12.04			75	23.33				33	15.41			27	14.68			38	14.48				12	18.99			101	15.76			6
		68	32.55							58	13.13								83	14.19			76	18.28				34	13.91			28	16.69			39	22.14				13	15.3							7
		69	14.52							59	15.01								84	16.53			77	19.43				35	14.64			29	20.2			40	16.22				14	14.3							8
		70	13.74							60	22.32								85	13.41			78	18.01				36	13.45			30	12.75			41	27.1				15	13.52							9
		71	20.43							61	13.93								86	24.52			79	25.82				37	15.85			31	17.79			42	13.85				16	13.94							10
		72	22.36							62	17.29								87	28.57			80	12.6				38	19.21			32	18.94			43	12.97				17	30.92							11
	3	1	20.34							63	13.71								88	21.15			81	13.28				39	12.63			33	14			44	26				18	14.74							12
		2	17.55							64	14.13								89	19.31			82	18.72				40	12.48			34	18.05			45	14.95				19	16.46							13
		3	21.97							65	13.12								90	17.56			83	25.96				41	13.65			35	18.99			46	16.61				20	17.94							14
		4	16.85							66	21.85								91	19.06			84	15.42				42	15.6			36	20.07			47	14.75				21	13.54							15
		5	16.88							67	23.09								92	18			85	17.05				43	15.58			37	14.53			48	14.15				22	21.48							16
		6	14.18							68	14.23								93	20.24			86	18.48				44	13.58			38	17.73			49	24.92				23	13.32							17
		7	21.64							69	15.06								94	14.19			87	17.8				45	15.15			39	13.68			50	16.14				24	15.14							18
		8	16.18							70	24.21								95	27.46			88	19.45				46	18.17			40	13.79			51	16.66				25	12.31							19
		9	20.94							71	20.07								96	23.49			89	17.27				47	18.04			41	15.85			52	23.91				26	17.93							20
		10	23.2							72	18.11								97	15.35			90	32.35				48	19.19			42	28.44			53	22.26				27	13.11							21
		11	14.24							73	28.75								98	19.37			91	18.8				49	14.1							54	21.09				28	12.5							22
		12	15.37							74	16.5								99	23.09			92	32.23				50	12.43							55	14.15				29	14.39							23
		13	14.33							75	13.96								100	16.03			93	13.92				51	16.96							56	14.96				30	15.04							24
		14	13.64							76	16.75								101	20.72			94	12.8				52	14.45							57	14.47				31	14.15							25
		15	19.58							77	13.64								102	22.15			95	14.74				53	21.5							58	16.67				32	16.19							26
		16	23.3							78	21.59								103	16.11			96	22.59				54	14.22							59	14.98				33	12.66							27
		17	18.52							79	12.98								104	16.66			97	17.03				55	23.62							60	14.64				34	18							28
		18	21.47							80	14.78								105	22.18			98	15.23				56	22.08							61	20.06												29
		19	12.61							81	16.49								106	19.82			99	20.24				57	12.86							62	16.66												30
		20	12.15							82	13.6								107	22.53			100	14.45				58	12.74																				31
		21	25.97							83	13.54								108	14.35			101	17.79				59	16.95																				32
		22	12.7							84	18.5								109	13.51			102	23.25				60	21.46																				33
		23	32.7							85	12.9								110	13.6			103	18.35				61	19.7																				34
		24	18.11							86	18.71								111	16.83			104	22.7				62	15.16																				35
		25	21.26							87	21.31								112	16.26			106	18.56				63	14.23																				36
		26	20.28							88	20.53								113	18.89			107	18.22				64	18.08																				37
		27	18.91																114	21.32			108	11.92				65	15.83																				38
		28	23.04																115	29.6			109	18.18				66	24.27																				39
		29	20.75																116	23.64			111	20.14				67	23.24																				40
		30	22.64																117	19.47			112	23.48				68	17.21																				41
		31	21.31																118	23.36			113	25.79				69	17.97																				42
		32	14.04																119	18.38			114	15.2				70	23.13																				43
		33	16.93																120	19.49			115	19.85				71	15.53																				44
		34	15.16																121	33.54			116	28.53				72	17.69																				45
		35	14.36																122	32.96			117	13.21				73	15.97																				46
		36	15.84																123	20.3			118	32.07				74	14.25																				47
		37	18.7																124	18.86																													48
		38	21.22																125	33.57																													49
		39	18.82																126	23.17																													50
		40	12.25																127	30.26																													51
		41	16.74																128	28.07
		42	19.22																129	15.35
		43	15.18																130	18.6
		44	14.46
		45	16.83
		46	14.54
		47	19.29
[truncated: 19 more columns]
