# Supplementary material for: Translesion polymerase kappa-dependent DNA synthesis underlies replication fork recovery
Source: eLife journal article supplement (doi:10.7554/elife.41426), 2018-11-13
Supplement: supp [file elife-41426-supp-v1.zip › elife_poa_e41426_Figure_6_source_data_1.xlsx]

## Sheet: Fig 6B
	Figure 6B	Senscence Associated Beta-galactosidase staining
	RPE
	2mM HU 4hrs
	24hr Media Chase
			siCtl Only HU A				siCtl sip53 HU A					siPolK Only HU A				siPolK sip53 HU A					siD2 Only HU A				siD2 sip53 HU A
			DAPI	Bgal			DAPI	Bgal				DAPI	Bgal			DAPI	Bgal				DAPI	Bgal			DAPI	Bgal
		1				1					1				1	115	3			1	346	17		1
		2	392	14		2	431	2			2				2	120	3			2	312	24		2
		3	406	13		3					3	158	13		3					3	378	31		3	418	6
		4				4					4	157	11		4	154	6			4				4	445	11
		5				5	365	1			5	172	12		5	203	4			5				5
		6				6					6	227	16		6					6				6
		7				7					7				7					7				7
		8				8					8	243	20		8					8				8
		9				9					9				9					9				9
		10				10					10				10					10				10
		Sum	798	27		Sum	796	3			Sum	957	72		Sum	592	16			Sum	1036	72		Sum	863	17
		%	0.0338346			%	0.00376884				%	0.0752351			%	0.027027				%	0.0694981			%	0.0196987
			siCtl Only HU B				siCtl sip53 HU B					siPolK Only HU B				siPolK sip53 HU B					siD2 Only HU B				siD2 sip53 HU B
			DAPI	Bgal			DAPI	Bgal				DAPI	Bgal			DAPI	Bgal				DAPI	Bgal			DAPI	Bgal
		1	311	8		1	400	8			1				1	158	2			1				1	399	6
		2	245	7		2	389	6			2	152	14		2	144	4			2				2
		3	320	12		3					3				3	142	2			3	374	38		3
		4				4					4	168	21		4					4	472	44		4	403	5
		5				5					5	147	17		5	145	4			5	370	29		5
		6				6					6	129	11		6					6				6
		7				7					7				7					7				7
		8				8					8				8					8				8
		9				9					9				9					9				9
		10				10					10				10					10				10
		Sum	876	27		Sum	789	14			Sum	596	63		Sum	589	12			Sum	1216	111		Sum	802	11
		%	0.0308219			%	0.017744				%	0.105705			%	0.0203735				%	0.0912829			%	0.0137157
			siCtl Only HU C				siCtl sip53 HU C					siPolK Only HU C				siPolK sip53 HU C					siD2 Only HU C				siD2 sip53 HU C
			DAPI	Bgal			DAPI	Bgal				DAPI	Bgal			DAPI	Bgal				DAPI	Bgal			DAPI	Bgal
		1	274	13		1	441	5			1				1	129	0			1	379	30		1
		2	337	8		2	365	3			2	140	16		2					2	361	18		2	509	8
		3	360	15		3					3	130	10		3					3				3	390	7
		4				4					4	132	14		4					4	328	28		4
		5				5					5				5	190	3			5				5
		6				6					6				6	132	3			6				6
		7				7					7				7					7				7
		8				8					8	135	8		8	157	2			8				8
		9				9					9				9					9				9
		10				10					10	129	16		10					10				10
		Sum	971	36		Sum	806	8			Sum	666	64		Sum	608	8			Sum	1068	76		Sum	899	15
		%	0.0370752			%	0.00992556				%	0.0960961			%	0.0131579				%	0.071161			%	0.0166852

## Sheet: Fig 6C
	Figure 6C	53BP1 Nuclear Bodies
	RPE
	2mM HU 4hrs
	18hr Media Chase
			siCtrl A										siPolK A										siD2 A										siKandD2 A
			1 focus	2 foci	3 or more foci	53BP1 Total	CycA Pos	CycA Neg	DAPI Total				1 focus	2 foci	3 or more foci	53BP1 Total	CycA Pos	CycA Neg	DAPI Total				1 focus	2 foci	3 or more foci	53BP1 Total	CycA Pos	CycA Neg	DAPI Total				1 focus	2 foci	3 or more foci	53BP1 Total	CycA Pos	CycA Neg	DAPI Total
		1	7	3	0	10	64	204	268			1	11	0	1	12	61	183	244			1	15	3	0	18	49	177	226			1	4	2	0	6	27	57	84
		2	7	1	1	9	54	181	235			2						0				2	15	5	0	20	54	127	181			2	11	2	3	16	51	105	156
		3						0				3	11	2	1	14	43	113	156			3						0				3	14	2	0	16	66	125	191
		4	12	4	0	16	78	228	306			4	12	3	0	15	66	144	210			4						0				4						0
		5	5	2	1	8	66	208	274			5	10	1	1	12	59	112	171			5	21	2	2	25	59	157	216			5	11	3	0	14	51	125	176
		6	9	0	1	10	43	153	196			6						0				6						0				6	14	3	2	19	54	108	162
		7						0				7	18	3	1	22	85	186	271			7						0				7						0
		8						0				8						0				8	11	3	1	15	68	127	195			8	16	2	0	18	45	136	181
		9						0				9						0				9	13	2	1	16	42	106	148			9						0
		10						0				10	13	1	0	14	64	137	201			10						0				10						0
		SUM	40	10	3	53		974				SUM	75	10	4	89		875				SUM	75	15	4	94		694				SUM	70	14	5	89		656
		%						0.0544148										0.101714										0.135447										0.135671
			siCtrl B										siPolK B										siD2 B										siK and D2 B
			1 focus	2 foci	3 or more foci	53BP1 Total	CycA Pos	CycA Neg	DAPI Total				1 focus	2 foci	3 or more foci	53BP1 Total	CycA Pos	CycA Neg	DAPI Total				1 focus	2 foci	3 or more foci	53BP1 Total	CycA Pos	CycA Neg	DAPI Total				1 focus	2 foci	3 or more foci	53BP1 Total	CycA Pos	CycA Neg	DAPI Total
		1	11	3	0	14	62	205	267			1	10	1	2	13	54	116	170			1	15	2	0	17	74	140	214			1						0
		2	15	0	1	16	64	241	305			2						0				2						0				2	7	1	0	8	37	74	111
		3						0				3	16	2	1	19	76	167	243			3	14	0	0	14	51	131	182			3	15	3	0	18	49	140	189
		4						0				4						0				4						0				4	9	0	2	11	45	101	146
		5	10			10	87	189	276			5	11	2	3	16	64	154	218			5	15	2	0	17	42	126	168			5						0
		6						0				6										6	15	2	1	18	72	159	231			6	10	3	0	13	56	112	168
		7						0				7	16	0	1	17	59	96	155			7						0				7	10	0	2	12	59	81	140
		8						0				8						0				8						0				8						0
		9						0				9						0				9						0				9	9	1	0	10	50	107	157
		10										10										10	12	3	0	15	50	169	219			10						0
		SUM	36	3	1	40		635				SUM	53	5	7	65		533				SUM	71	9	1	81		725				SUM	60	8	4	72		615
		%						0.0629921										0.121951										0.111724										0.117073
			siCtrl C										siPolK C										siD2 C										siK and D2 C
			1 focus	2 foci	3 or more foci	53BP1 Total	CycA Pos	CycA Neg	DAPI Total				1 focus	2 foci	3 or more foci	53BP1 Total	CycA Pos	CycA Neg	DAPI Total				1 focus	2 foci	3 or more foci	53BP1 Total	CycA Pos	CycA Neg	DAPI Total				1 focus	2 foci	3 or more foci	53BP1 Total	CycA Pos	CycA Neg	DAPI Total
		1	12	2	1	15	82	212	294			1	14	2	2	18	60	164	224			1						0				1	9	1	0	10	44	79	123
		2						0				2	4	1	2	7	66	108	174			2	8	0	1	9	43	120	163			2						0
		3	14	0	0	14	54	202	256			3						0				3						0				3	9	2	1	12	55	127	182
		4						0				4	17	0	2	19	60	131	191			4	14	1	0	15	64	129	193			4						0
		5	13	0	0	13	61	180	241			5						0				5						0				5	9	1	0	10	38	89	127
		6										6						0				6	20	0	3	23	61	177	238			6						0
		7										7						0				7						0				7	14	1	0	15	49	121	170
		8										8	16	2	0	18	46	129	175			8	17	2	1	20	50	151	201			8	8	2	0	10	48	89	137
		9										9	6	1	2	9	62	103	165			9						0				9	13	0	1	14	52	123	175
		10										10										10	17	1	1	19	60	149	209			10						0
		SUM	39	2	1	42		594				SUM	57	6	8	71		635				SUM	76	4	6	86		726				SUM	62	7	2	71		628
		%						0.0707071										0.111811										0.118457										0.113057

## Sheet: Fig 6-figure supplement 1B
	Fig 6-figure supplement 1B			Beta-Galactosidase Staining
	RPE
	2mM HU 4hrs
	24hr media chase
			siCtrl A				siPolK A				siD2 A				siK and D2 A
			Beta-Gal Pos	DAPI			Beta-Gal Pos	DAPI			Beta-Gal Pos	DAPI			Beta-Gal Pos	DAPI
		1	8	178		1	37	316		1	18	172		1	23	205
		2	12	303		2	55	364		2				2
		3	17	377		3				3	35	285		3	37	296
		4				4				4				4	23	168
		5				5	25	218		5	33	267		5
		6				6				6				6
		7				7				7				7
		8				8				8				8
		Total	37	858		Total	117	898		Total	86	724		Total	83	669
		%		0.0431235		%		0.13029		%		0.118785		%		0.124066
			siCtrl B				siPolK B				siD2 B				siK and D2 B
			Beta-Gal Pos	DAPI			Beta-Gal Pos	DAPI			Beta-Gal Pos	DAPI			Beta-Gal Pos	DAPI
		1				1	16	208		1	60	303		1	30	211
		2	7	227		2	14	172		2				2	33	251
		3	13	319		3	75	460		3				3
		4	24	339		4	23	222		4	35	318		4	26	204
		5				5				5	19	165		5
		6				6				6				6
		7				7			28	7				7
		8				8			257	8				8
		Total	44	885		Total	128	1062		Total	114	786		Total	89	666
		%		0.0497175		%		0.120527		%		0.145038		%		0.133634
			siCtrl C				siPolK C				siD2 C				siK and D2 C
			Beta-Gal Pos	DAPI			Beta-Gal Pos	DAPI			Beta-Gal Pos	DAPI			Beta-Gal Pos	DAPI
		1	24	392		1	19	266		1	19	199		1	39	278
		2				2				2	25	276		2	36	246
		3	22	371		3	31	205		3				3	28	248
		4	9	236		4				4	38	301		4
		5				5				5				5
		6				6	30	260		6				6
		7				7				7				7
		8				8				8				8
		Total	55	999		Total	80	731		Total	82	776		Total	103	772
		%		0.0550551		%		0.109439		%		0.10567		%		0.13342

## Sheet: Fig 6-figure supplement 1C
	Fig6-figure supplement 1C		53BP1 Nuclear Bodies -/+ Mirin
	RPE
	2mM HU -/+ 50uM Mirin 4hrs
	18 hr media Chase
			1 focus	2 foci	3 or more			1 focus	2 foci	3 or more			1 focus	2 foci	3 or more			1 focus	2 foci	3 or more			1 focus	2 foci	3 or more			1 focus	2 foci	3 or more				1 focus	2 foci	3 or more			1 focus	2 foci	3 or more			1 focus	2 foci	3 or more			1 focus
			40	2	2		A Neg	57	9	1			41	5	0			25	8	1			34	5	3			38	4	4				51	5	2			46	11	8			49	4	4			48
		53BP1 total:	44				53BP1 total:	67				53BP1 total:	46				53BP1 total:	34				53BP1 total:	42				53BP1 total:	46					53BP1 total:	58				53BP1 total:	65				53BP1 total:	57				53BP1 total:	65
		CycA Neg total:	534				CycA Neg total:	581				CycA Neg total:	511				CycA Neg total:	388				CycA Neg total:	449				CycA Neg total:	386					CycA Neg total:	349				CycA Neg total:	341				CycA Neg total:	334				CycA Neg total:	416
		%	0.082397				%	0.115318				%	0.0900196				%	0.0876289				%	0.0935412				%	0.119171					%	0.166189				%	0.190616				%	0.170659				%	0.15625
			siCtl HU only A					siCtl HU only B					siCtl HU only C					siCtl HU Mirin A					siCtl HU Mirin B					siCtl HU Mirin C						siPolK HU Only A					siPolK HU Only B					siPolK HU Only C					siPolK HU Mirin A
			Image 1					Image 1					Image 1					Image 1					Image 1					Image 1						Image 2					Image 1					Image 2					Image 1
		53BP1:	1 focus	2 foci	3 or more		53BP1:	1 focus	2 foci	3 or more		53BP1:	1 focus	2 foci	3 or more		53BP1:	1 focus	2 foci	3 or more		53BP1:	1 focus	2 foci	3 or more		53BP1:	1 focus	2 foci	3 or more			53BP1:	1 focus	2 foci	3 or more		53BP1:	1 focus	2 foci	3 or more		53BP1:	1 focus	2 foci	3 or more		53BP1:	1 focus
		Cyc A Neg	10	0	1		Cyc A Neg	11	2	1		Cyc A Neg	6	2			Cyc A Neg	7	3	0		Cyc A Neg	8	1	1		Cyc A Neg	10		1			Cyc A Neg	3		1		Cyc A Neg	4	1			Cyc A Neg	3	1	2		Cyc A Neg	1
		Cyc A Pos					Cyc A Pos	2				Cyc A Pos					Cyc A Pos		1			Cyc A Pos	1		4		Cyc A Pos	1	2	1			Cyc A Pos					Cyc A Pos			2		Cyc A Pos		1			Cyc A Pos	1
		DAPI Total:	190				DAPI Total:	153				DAPI Total:	103				DAPI Total:	159				DAPI Total:	153				DAPI Total:	150					DAPI Total:	48				DAPI Total:	28				DAPI Total:	51				DAPI Total:	43
		Cyc A pos:	36				Cyc A pos:	31				Cyc A pos:	36				Cyc A pos:	53				Cyc A pos:	33				Cyc A pos:	32					Cyc A pos:	17				Cyc A pos:	9				Cyc A pos:	14				Cyc A pos:	15
		Cyc A Neg	154				Cyc A Neg	122				Cyc A Neg	67				Cyc A Neg	106				Cyc A Neg	120				Cyc A Neg	118					Cyc A Neg	31				Cyc A Neg	19				Cyc A Neg	37				Cyc A Neg	28
			Image 2					Image 2					Image 2					Image 2					Image 2					Image 2						Image 3					Image 2					Image 3					Image 3
		53BP1:	1 focus	2 foci	3 or more		53BP1:	1 focus	2 foci	3 or more		53BP1:	1 focus	2 foci	3 or more		53BP1:	1 focus	2 foci	3 or more		53BP1:	1 focus	2 foci	3 or more		53BP1:	1 focus	2 foci	3 or more			53BP1:	1 focus	2 foci	3 or more		53BP1:	1 focus	2 foci	3 or more		53BP1:	1 focus	2 foci	3 or more		53BP1:	1 focus
		Cyc A Neg	10	0	1		Cyc A Neg	9	1			Cyc A Neg	9				Cyc A Neg	2	2			Cyc A Neg	6	1			Cyc A Neg	10	1				Cyc A Neg	2	1			Cyc A Neg	9		2		Cyc A Neg	8	1			Cyc A Neg	5
		Cyc A Pos					Cyc A Pos		1	1		Cyc A Pos	1		1		Cyc A Pos		1			Cyc A Pos		1	3		Cyc A Pos			2			Cyc A Pos	1				Cyc A Pos		2	1		Cyc A Pos	1				Cyc A Pos
		DAPI Total:	156				DAPI Total:	139				DAPI Total:	137				DAPI Total:	136				DAPI Total:	134				DAPI Total:	112					DAPI Total:	75				DAPI Total:	54				DAPI Total:	80				DAPI Total:	49
		Cyc A pos:	43				Cyc A pos:	27				Cyc A pos:	28				Cyc A pos:	42				Cyc A pos:	49				Cyc A pos:	23					Cyc A pos:	48				Cyc A pos:	17				Cyc A pos:	25				Cyc A pos:	16
		Cyc A Neg	113				Cyc A Neg	112				Cyc A Neg	109				Cyc A Neg	94				Cyc A Neg	85				Cyc A Neg	89					Cyc A Neg	27				Cyc A Neg	37				Cyc A Neg	55				Cyc A Neg	33
			Image 3					Image 3					Image 4					Image 3					Image 3					Image 3						Image 4					Image 3					Image 4					Image 4
		53BP1:	1 focus	2 foci	3 or more		53BP1:	1 focus	2 foci	3 or more		53BP1:	1 focus	2 foci	3 or more		53BP1:	1 focus	2 foci	3 or more		53BP1:	1 focus	2 foci	3 or more		53BP1:	1 focus	2 foci	3 or more			53BP1:	1 focus	2 foci	3 or more		53BP1:	1 focus	2 foci	3 or more		53BP1:	1 focus	2 foci	3 or more		53BP1:	1 focus
		Cyc A Neg	10	1	0		Cyc A Neg	11	3			Cyc A Neg	7				Cyc A Neg	11	1			Cyc A Neg	11	1	1		Cyc A Neg	5	1	3			Cyc A Neg	7	2			Cyc A Neg	3	2			Cyc A Neg	7	1	1		Cyc A Neg	3
		Cyc A Pos					Cyc A Pos					Cyc A Pos					Cyc A Pos					Cyc A Pos		2	3		Cyc A Pos	1		2			Cyc A Pos		1	1		Cyc A Pos	2	2	1		Cyc A Pos			3		Cyc A Pos	1
		DAPI Total:	136				DAPI Total:	180				DAPI Total:	150				DAPI Total:	134				DAPI Total:	163				DAPI Total:	128					DAPI Total:	45				DAPI Total:	44				DAPI Total:	61				DAPI Total:	66
		Cyc A pos:	28				Cyc A pos:	49				Cyc A pos:	30				Cyc A pos:	30				Cyc A pos:	40				Cyc A pos:	47					Cyc A pos:	28				Cyc A pos:	14				Cyc A pos:	21				Cyc A pos:	34
		Cyc A Neg	108				Cyc A Neg	131				Cyc A Neg	120				Cyc A Neg	104				Cyc A Neg	123				Cyc A Neg	81					Cyc A Neg	17				Cyc A Neg	30				Cyc A Neg	40				Cyc A Neg	32
			Image 5					Image 5					Image 5					Image 4					Image 4					Image 5						Image 5					Image 4					Image 6					Image 5
		53BP1:	1 focus	2 foci	3 or more		53BP1:	1 focus	2 foci	3 or more		53BP1:	1 focus	2 foci	3 or more		53BP1:	1 focus	2 foci	3 or more		53BP1:	1 focus	2 foci	3 or more		53BP1:	1 focus	2 foci	3 or more			53BP1:	1 focus	2 foci	3 or more		53BP1:	1 focus	2 foci	3 or more		53BP1:	1 focus	2 foci	3 or more		53BP1:	1 focus
		Cyc A Neg	10	1	0		Cyc A Neg	18	2			Cyc A Neg	13	1			Cyc A Neg	5	2	1		Cyc A Neg	9	2	1		Cyc A Neg	13	2				Cyc A Neg	6				Cyc A Neg	4		1		Cyc A Neg	5		1		Cyc A Neg	2
		Cyc A Pos					Cyc A Pos	2	1	1		Cyc A Pos		1	2		Cyc A Pos			1		Cyc A Pos		1	7		Cyc A Pos	2	1	4			Cyc A Pos	1	1			Cyc A Pos	1		1		Cyc A Pos		1	2		Cyc A Pos
		DAPI Total:	214				DAPI Total:	170				DAPI Total:	175				DAPI Total:	131				DAPI Total:	157				DAPI Total:	169					DAPI Total:	46				DAPI Total:	38				DAPI Total:	44				DAPI Total:	52
		Cyc A pos:	55				Cyc A pos:	42				Cyc A pos:	55				Cyc A pos:	47				Cyc A pos:	36				Cyc A pos:	71					Cyc A pos:	19				Cyc A pos:	14				Cyc A pos:	10				Cyc A pos:	18
		Cyc A Neg	159				Cyc A Neg	128				Cyc A Neg	120				Cyc A Neg	84				Cyc A Neg	121				Cyc A Neg	98					Cyc A Neg	27				Cyc A Neg	24				Cyc A Neg	34				Cyc A Neg	34
			Image					Image 6					Image 6					Image					Image					Image						Image 9					Image 5					Image 8					Image 6
		53BP1:	1 focus	2 foci	3 or more		53BP1:	1 focus	2 foci	3 or more		53BP1:	1 focus	2 foci	3 or more		53BP1:	1 focus	2 foci	3 or more		53BP1:	1 focus	2 foci	3 or more		53BP1:	1 focus	2 foci	3 or more			53BP1:	1 focus	2 foci	3 or more		53BP1:	1 focus	2 foci	3 or more		53BP1:	1 focus	2 foci	3 or more		53BP1:	1 focus
		Cyc A Neg					Cyc A Neg	8	1			Cyc A Neg	6	2			Cyc A Neg					Cyc A Neg					Cyc A Neg						Cyc A Neg	3	1			Cyc A Neg	3	3			Cyc A Neg	4				Cyc A Neg	5
		Cyc A Pos					Cyc A Pos					Cyc A Pos		2			Cyc A Pos					Cyc A Pos					Cyc A Pos						Cyc A Pos					Cyc A Pos	1		1		Cyc A Pos	1				Cyc A Pos
		DAPI Total:					DAPI Total:	126				DAPI Total:	136				DAPI Total:					DAPI Total:					DAPI Total:						DAPI Total:	45				DAPI Total:	50				DAPI Total:	41				DAPI Total:	48
		Cyc A pos:					Cyc A pos:	38				Cyc A pos:	41				Cyc A pos:					Cyc A pos:					Cyc A pos:						Cyc A pos:	18				Cyc A pos:	15				Cyc A pos:	9				Cyc A pos:	13
		Cyc A Neg	0				Cyc A Neg	88				Cyc A Neg	95				Cyc A Neg	0				Cyc A Neg	0				Cyc A Neg	0					Cyc A Neg	27				Cyc A Neg	35				Cyc A Neg	32				Cyc A Neg	35
			Image					Image					Image					Image					Image					Image						Image 10					Image 6					Image 9					Image 8
		53BP1:	1 focus	2 foci	3 or more		53BP1:	1 focus	2 foci	3 or more		53BP1:	1 focus	2 foci	3 or more		53BP1:	1 focus	2 foci	3 or more		53BP1:	1 focus	2 foci	3 or more		53BP1:	1 focus	2 foci	3 or more			53BP1:	1 focus	2 foci	3 or more		53BP1:	1 focus	2 foci	3 or more		53BP1:	1 focus	2 foci	3 or more		53BP1:	1 focus
		Cyc A Neg					Cyc A Neg					Cyc A Neg					Cyc A Neg					Cyc A Neg					Cyc A Neg						Cyc A Neg	2		1		Cyc A Neg	3				Cyc A Neg	6				Cyc A Neg	3
		Cyc A Pos					Cyc A Pos					Cyc A Pos					Cyc A Pos					Cyc A Pos					Cyc A Pos						Cyc A Pos			1		Cyc A Pos	1		1		Cyc A Pos		1	2		Cyc A Pos
		DAPI Total:					DAPI Total:					DAPI Total:					DAPI Total:					DAPI Total:					DAPI Total:						DAPI Total:	37				DAPI Total:	32				DAPI Total:	60				DAPI Total:	66
		Cyc A pos:					Cyc A pos:					Cyc A pos:					Cyc A pos:					Cyc A pos:					Cyc A pos:						Cyc A pos:	10				Cyc A pos:	11				Cyc A pos:	14				Cyc A pos:	30
		Cyc A Neg	0				Cyc A Neg	0				Cyc A Neg	0				Cyc A Neg	0				Cyc A Neg	0				Cyc A Neg	0					Cyc A Neg	27				Cyc A Neg	21				Cyc A Neg	46				Cyc A Neg	36
			Image					Image					Image					Image					Image					Image						Image 11					Image 7					Image 10					Image 9
		53BP1:	1 focus	2 foci	3 or more		53BP1:	1 focus	2 foci	3 or more		53BP1:	1 focus	2 foci	3 or more		53BP1:	1 focus	2 foci	3 or more		53BP1:	1 focus	2 foci	3 or more		53BP1:	1 focus	2 foci	3 or more			53BP1:	1 focus	2 foci	3 or more		53BP1:	1 focus	2 foci	3 or more		53BP1:	1 focus	2 foci	3 or more		53BP1:	1 focus
		Cyc A Neg					Cyc A Neg					Cyc A Neg					Cyc A Neg					Cyc A Neg					Cyc A Neg						Cyc A Neg	6				Cyc A Neg	6	1	1		Cyc A Neg	8	1			Cyc A Neg	4
		Cyc A Pos					Cyc A Pos					Cyc A Pos					Cyc A Pos					Cyc A Pos					Cyc A Pos						Cyc A Pos					Cyc A Pos	1		1		Cyc A Pos	1				Cyc A Pos	1
		DAPI Total:					DAPI Total:					DAPI Total:					DAPI Total:					DAPI Total:					DAPI Total:						DAPI Total:	51				DAPI Total:	56				DAPI Total:	56				DAPI Total:	50
		Cyc A pos:					Cyc A pos:					Cyc A pos:					Cyc A pos:					Cyc A pos:					Cyc A pos:						Cyc A pos:	13				Cyc A pos:	19				Cyc A pos:	14				Cyc A pos:	17
		Cyc A Neg	0				Cyc A Neg	0				Cyc A Neg	0				Cyc A Neg	0				Cyc A Neg	0				Cyc A Neg	0					Cyc A Neg	38				Cyc A Neg	37				Cyc A Neg	42				Cyc A Neg	33
			Image					Image					Image					Image					Image					Image						Image 14					Image 8					Image 11					Image 11
		53BP1:	1 focus	2 foci	3 or more		53BP1:	1 focus	2 foci	3 or more		53BP1:	1 focus	2 foci	3 or more		53BP1:	1 focus	2 foci	3 or more		53BP1:	1 focus	2 foci	3 or more		53BP1:	1 focus	2 foci	3 or more			53BP1:	1 focus	2 foci	3 or more		53BP1:	1 focus	2 foci	3 or more		53BP1:	1 focus	2 foci	3 or more		53BP1:	1 focus
		Cyc A Neg					Cyc A Neg					Cyc A Neg					Cyc A Neg					Cyc A Neg					Cyc A Neg						Cyc A Neg	3				Cyc A Neg	3	3	1		Cyc A Neg	4				Cyc A Neg	6
		Cyc A Pos					Cyc A Pos					Cyc A Pos					Cyc A Pos					Cyc A Pos					Cyc A Pos						Cyc A Pos		1			Cyc A Pos			1		Cyc A Pos					Cyc A Pos
		DAPI Total:					DAPI Total:					DAPI Total:					DAPI Total:					DAPI Total:					DAPI Total:						DAPI Total:	25				DAPI Total:	55				DAPI Total:	40				DAPI Total:	68
		Cyc A pos:					Cyc A pos:					Cyc A pos:					Cyc A pos:					Cyc A pos:					Cyc A pos:						Cyc A pos:	6				Cyc A pos:	18				Cyc A pos:	13				Cyc A pos:	20
		Cyc A Neg	0				Cyc A Neg	0				Cyc A Neg	0				Cyc A Neg	0				Cyc A Neg	0				Cyc A Neg	0					Cyc A Neg	19				Cyc A Neg	37				Cyc A Neg	27				Cyc A Neg	48
			Image					Image					Image																					Image 15					Image 9					Image 13					Image 13
		53BP1:	1 focus	2 foci	3 or more		53BP1:	1 focus	2 foci	3 or more		53BP1:	1 focus	2 foci	3 or more																		53BP1:	1 focus	2 foci	3 or more		53BP1:	1 focus	2 foci	3 or more		53BP1:	1 focus	2 foci	3 or more		53BP1:	1 focus
		Cyc A Neg					Cyc A Neg					Cyc A Neg																					Cyc A Neg	6				Cyc A Neg	4				Cyc A Neg	4				Cyc A Neg	5
		Cyc A Pos					Cyc A Pos					Cyc A Pos																					Cyc A Pos		1	1		Cyc A Pos		2	2		Cyc A Pos					Cyc A Pos
		DAPI Total:					DAPI Total:					DAPI Total:																					DAPI Total:	34				DAPI Total:	65				DAPI Total:	32				DAPI Total:	55
		Cyc A pos:					Cyc A pos:					Cyc A pos:																					Cyc A pos:	11				Cyc A pos:	25				Cyc A pos:	11				Cyc A pos:	14
		Cyc A Neg	0				Cyc A Neg	0				Cyc A Neg	0																				Cyc A Neg	23				Cyc A Neg	40				Cyc A Neg	21				Cyc A Neg	41
			Image					Image					Image																					Image 16					Image 10					Image					Image 14
		53BP1:	1 focus	2 foci	3 or more		53BP1:	1 focus	2 foci	3 or more		53BP1:	1 focus	2 foci	3 or more																		53BP1:	1 focus	2 foci	3 or more		53BP1:	1 focus	2 foci	3 or more		53BP1:	1 focus	2 foci	3 or more		53BP1:	1 focus
		Cyc A Neg					Cyc A Neg					Cyc A Neg																					Cyc A Neg	1	1			Cyc A Neg	1	1	1		Cyc A Neg					Cyc A Neg	3
		Cyc A Pos					Cyc A Pos					Cyc A Pos																					Cyc A Pos		1	1		Cyc A Pos		2	3		Cyc A Pos					Cyc A Pos
		DAPI Total:					DAPI Total:					DAPI Total:																					DAPI Total:	30				DAPI Total:	34				DAPI Total:					DAPI Total:	49
		Cyc A pos:					Cyc A pos:					Cyc A pos:																					Cyc A pos:	13				Cyc A pos:	14				Cyc A pos:					Cyc A pos:	18
		Cyc A Neg	0				Cyc A Neg	0				Cyc A Neg	0																				Cyc A Neg	17				Cyc A Neg	20				Cyc A Neg	0				Cyc A Neg	31
			Image					Image					Image																					Image 22					Image 12					Image					Image19
		53BP1:	1 focus	2 foci	3 or more		53BP1:	1 focus	2 foci	3 or more		53BP1:	1 focus	2 foci	3 or more																		53BP1:	1 focus	2 foci	3 or more		53BP1:	1 focus	2 foci	3 or more		53BP1:	1 focus	2 foci	3 or more		53BP1:	1 focus
		Cyc A Neg					Cyc A Neg					Cyc A Neg																					Cyc A Neg	3				Cyc A Neg	6		2		Cyc A Neg					Cyc A Neg	6
		Cyc A Pos					Cyc A Pos					Cyc A Pos																					Cyc A Pos		1	2		Cyc A Pos			3		Cyc A Pos					Cyc A Pos
		DAPI Total:					DAPI Total:					DAPI Total:																					DAPI Total:	47				DAPI Total:	55				DAPI Total:					DAPI Total:	61
		Cyc A pos:					Cyc A pos:					Cyc A pos:																					Cyc A pos:	14				Cyc A pos:	14				Cyc A pos:					Cyc A pos:	24
		Cyc A Neg	0				Cyc A Neg	0				Cyc A Neg	0																				Cyc A Neg	33				Cyc A Neg	41				Cyc A Neg	0				Cyc A Neg	37
			Image					Image					Image																					Image 23					Image					Image					Image 33
		53BP1:	1 focus	2 foci	3 or more		53BP1:	1 focus	2 foci	3 or more		53BP1:	1 focus	2 foci	3 or more																		53BP1:	1 focus	2 foci	3 or more		53BP1:	1 focus	2 foci	3 or more		53BP1:	1 focus	2 foci	3 or more		53BP1:	1 focus
		Cyc A Neg					Cyc A Neg					Cyc A Neg																					Cyc A Neg	4				Cyc A Neg					Cyc A Neg					Cyc A Neg	5
		Cyc A Pos					Cyc A Pos					Cyc A Pos																					Cyc A Pos			2		Cyc A Pos					Cyc A Pos					Cyc A Pos
		DAPI Total:					DAPI Total:					DAPI Total:																					DAPI Total:	42				DAPI Total:					DAPI Total:					DAPI Total:	42
		Cyc A pos:					Cyc A pos:					Cyc A pos:																					Cyc A pos:	14				Cyc A pos:					Cyc A pos:					Cyc A pos:	14
		Cyc A Neg	0				Cyc A Neg	0				Cyc A Neg	0																				Cyc A Neg	28				Cyc A Neg	0				Cyc A Neg	0				Cyc A Neg	28
																																		Image 29					Image					Image					Image
																																	53BP1:	1 focus	2 foci	3 or more		53BP1:	1 focus	2 foci	3 or more		53BP1:	1 focus	2 foci	3 or more		53BP1:	1 focus
																																	Cyc A Neg	5				Cyc A Neg					Cyc A Neg					Cyc A Neg
																																	Cyc A Pos			4		Cyc A Pos					Cyc A Pos					Cyc A Pos
																																	DAPI Total:	48				DAPI Total:					DAPI Total:					DAPI Total:
																																	Cyc A pos:	13				Cyc A pos:					Cyc A pos:					Cyc A pos:
																																	Cyc A Neg	35				Cyc A Neg	0				Cyc A Neg	0				Cyc A Neg	0
[truncated: 34 more columns]
